# Supplementary material
Source: PubMed Central journal article supplement (PMC2853181)
Supplement: NIHMS170964-supplement-1.pdf [file NIHMS170964-supplement-1.pdf]

## Innate immune lectins kill bacteria expressing blood group antigen

Sean R. Stowell, Connie M. Arthur, Marcelo Dias-Baruffi, Lilian C. Rodrigues, Jean-Philippe Gourdine, Jamie Heimburg-Molinaro, Tongzhong Ju, Ross J. Molinaro, Carlos Rivera-Marrero, Baoyun Xia, David F. Smith, and Richard D. Cummings

### Supplementary Information

#### Supplementary Methods

*Preparation of recombinant human galectins-* We prepared Gal-1, Gal-3, Gal-4, Gal-4 domains, Gal-8, Gal-8 domains, and Gal-8 mutants as outlined previously<sup>1</sup>. To generate Gal-8R69H we used forward primer 5'-GTGGCCTTTTCATTTCAATCCTCATTTCAAAAGGGCCGGCTGCATG-3' and reverse primer 5'-CAATGCAGCCGGCCCTTTTCAAATGAGGATTGAATGAAAGGCCAC-3'. To generate Gal-8R233H we used forward primer 5'-GCTCTACACTTGAACCCACACCTGAATATTAAGCATTG-3' and reverse primer 5'-CAAATGCTTTAATATTCAGGTGTGGGTTCAAGTGTAGAGC-3'. We purified recombinant galectins by affinity chromatography on lactosyl-sepharose and eluted with 100 mM lactose in PBS plus 2-mercaptoethanol (2-ME). We purified galectins to apparent homogeneity as observed by SDS-PAGE (**Supplementary Figure 1**). Prior to derivatization, we removed 2-ME from galectin samples using a PD-10 gel filtration column (GE Healthcare), followed by addition of lactose (100 mM final concentration) to help maintain galectin stability and reduce the likelihood of adduct formation at or near the carbohydrate recognition domain (CRD). We biotinylated all galectins by incubating 3-5 mg mL<sup>-1</sup> of galectin with 2 mM EZ-link<sup>TM</sup> Sulfo-NHS-LC-Biotin (Sulfosuccinimidyl-6-(biotinamido) hexanoate) (Pierce) for 2 h at 4 °C. We separated unconjugated EZ-link<sup>TM</sup> Sulfo-NHS-LC-Biotin and free lactose from derivatized protein using a PD-10 gel filtration column.

*Glycan array preparation and analysis-* We obtained from the Consortium for Functional Glycomics (<http://www.functionalglycomics.org/>) glycan microarrays prepared as described previously<sup>2</sup>. For galectin recognition of glycans on the printed glycan microarray, we incubated 0.2 μM Gal-1, 0.2 μM Gal-3, 0.5 μM Gal-4, or 0.02 μM Gal-8 in Tris buffer/Salts/Metal ions (TSM) Binding Buffer (20 mM Tris-HCl, 150 mM sodium chloride, 2 mM calcium chloride, 2 mM magnesium chloride, pH 7.4, 1% BSA, and 0.05% Tween 20, with 14 mM 2-ME) for 1 h at room temperature in a dark humid chamber. We washed the slide by successive immersion in TSM containing 0.05% Tween 20 (4x) and TSM (4x). We incubated the slide with Alexa Fluor-488-streptavidin. After 1 h at room temperature in a dark humid chamber, we washed the slide by successive immersion in TSM containing 0.05% Tween 20 (4x), TSM (4x), and water (4x). We dried the slide by microcentrifugation and obtained an image of bound fluorescence using a microarray scanner (Scan Array Express, PerkinElmer Lifer Sciences). We determined the integrated spot intensities using Imogene software (BioDiscovery).

*Generating GFP expressing P. aeruginosa-* We obtained *P. aeruginosa* strain 8830 from Dr. Ananda Chakrabaty (University of Illinois College of Medicine). To generate a GFP expressing *P. aeruginosa*, we grew bacteria in trypticase soy broth at 37 °C until the OD 600 nm was

between 0.8 and 0.9. We pelleted bacteria by centrifugation at 5,000 rpm for 15 min at 4 °C and washed them first in PBS at 4 °C, then water at 4 °C and finally resuspended them in 10% glycerol. We added approximately 1 µg of plasmid pSMC21 encoding GFP, provided by Dr. O'Toole (Dartmouth Medical School), to 50 µL of the bacteria, then electroporated the bacteria using a 2-mm-gap electroporation cuvette (Bio-Rad Laboratories) at 18 kV with a Transporator™ plus (BTX). We diluted the electroporated cells into 1 ml LB medium and grew them for 1 h followed by plating on LB agar supplemented with 500 µg mL<sup>-1</sup> ampicillin. We identified positive colonies by fluorescence microscopy.

*Preparation of samples for SEM-* We incubated blood group B positive *E. coli* O86 (BG B+ *E. coli*), grown to mid-log phase, for 30 min with PBS control or 5 µM Gal-8 at 37 °C then added 20 mM lactose to halt treatment and reduce agglutination. We washed bacteria 2x with PBS to remove debris. Droplets containing either untreated or Gal-8-treated bacteria were placed onto poly-L-Lysine treated silicon chips and allowed to settle, then fixed overnight in 2.5% glutaraldehyde in 0.1 M cacodylate buffer, pH 7.4. We washed samples with distilled water, post fixed them in 1% osmium tetroxide, then washed with distilled water and dehydrated them through an ascending ethanol series to three changes of 100% ethanol. The ethanol was exchanged with Hexamethyldisilazane (HMDS) via three changes of HMDS then allowed the HMDS level to drop and the samples allowed to dry completely overnight. We mounted samples onto SEM stubs and sputter coated with either gold or chromium and viewed them in the DS130 SEM (ISI-TOPCON) using in-lens imaging. We viewed the displayed images at 20,000x magnification.

*Preparation of samples for TEM-* We treated and washed BG B+ *E. coli* as described for SEM preparation then centrifuged bacteria in a table-top centrifuge and fixed them overnight with 2.5% glutaraldehyde in 0.1 M cacodylate buffer, pH 7.4. We washed the bacterial pellets 2x in distilled water and post fixed them in 1% osmium tetroxide, then washed them in distilled water and dehydrated them through an ascending ethanol series to two changes of 100% ethanol. At the 50% ethanol step we en bloc stained the cells with 2.5% Uranyl Acetate in 50% ethanol. We accomplished resin infiltration via two steps of ethanol and resin mixtures (1:1 and 1:2) and finally two exchanges of 100% fresh resin and then embedded cells in fresh resin and polymerized them for three days. We performed microtomy using glass knives and an MT-7000 (RMC) ultra-microtome, and cut thin sections to about 70 to 90 nm thickness and collected onto 200 mesh copper grids. We post stained thin sections with 5% Uranyl acetate and Reynold's Lead Citrate and documented results using a JEOL JEM 1210 TEM at 100KV. We viewed the displayed images at 8,000x magnification and also show a close up view of a single bacterium from the same field.

*Animal studies-* We obtained C57BL/6 Specific Pathogens Free (SPF) mice from the animal facilities of the Faculdade de Ciências Farmacêuticas de Ribeirão Preto, Universidade de São Paulo, Brazil and maintained them at 20 °C in an isolator rack (Alesco, Monte Mor-SP, Brazil) with an autoclaved water and chow diet *ad libitum*, on 12 h light cycles. We conducted all experiments in accordance with the guidelines of the Animal Care Committee from this University (process # 09.1.543.53.5)

*In vivo bacterial killing assay*- We plated *E. coli* strains (BG B<sup>+</sup> *E. coli* and *WaaL*<sup>-</sup> BG B<sup>-</sup> *E. coli*) for isolation on LB agar (Difco Laboratories) and selected colonies to inoculate 50 mL of LB broth (Difco Laboratories), to grow overnight at 37 °C. To eliminate resident facultative bacteria and optimize intestinal colonization with *E. coli* strains, we treated 5 week old male mice for 48 h with streptomycin sulfate (5 g L<sup>-1</sup>) (Sigma-Aldrich) in sterile drinking water followed by sterile water for 24 h prior to ingestion of bacterial suspension<sup>3,4</sup>. We inoculated mice (four per group) by oral gavage with 10<sup>6</sup> colony-forming units (CFU) per mL of BG B<sup>+</sup> *E. coli* or *WaaL*<sup>-</sup> *E. coli* in 100 µL (10<sup>5</sup> CFU) of sterile PBS using a 22-gauge stainless steel animal feeding needle. Mice also received by oral gavage 300 µL of TDG (50 mM – 5.38 mg per animal) or 300 µL of PBS divided into three injections of 100 µL administered immediately before, 6 h after and 12 h after inoculation. Control mice, treated with streptomycin, received PBS alone. To recover bacteria, we sacrificed mice 24 h after bacteria inoculation, using CO<sub>2</sub> inhalation. From each mouse we aseptically excised, weighed, and homogenized the entire intestine in 6 mL sterile PBS using a homogenizer T10 (IKA®-Works, Inc.). We determined the number of viable bacteria in each intestine homogenate by plating serial dilutions (1000-fold) onto lactose MacConkey agar plates. After incubation at 37 °C for 20 h, we enumerated CFU and expressed per intestine ± SEM. We applied student's t-test for statistical analysis of data. P-values were <0.05, which was considered statistically significant. Results represent two independent experiments.

### Supplementary References

1. Stowell, S.R. et al. Galectin-1, -2, and -3 exhibit differential recognition of sialylated glycans and blood group antigens. *J Biol Chem* **283**, 10109-23 (2008).
2. Blixt, O. et al. Printed covalent glycan array for ligand profiling of diverse glycan binding proteins. *Proc Natl Acad Sci U S A* **101**, 17033-8 (2004).
3. Miller, C.P. & Bohnhoff, M. Changes in the Mouse's Enteric Microflora Associated with Enhanced Susceptibility to Salmonella Infection Following Streptomycin Treatment. *J Infect Dis* **113**, 59-66 (1963).
4. Posekany, K.J., Pittman, H.K., Bradfield, J.F., Haisch, C.E. & Verbanac, K.M. Induction of cytolytic anti-Gal antibodies in alpha-1,3-galactosyltransferase gene knockout mice by oral inoculation with Escherichia coli O86:B7 bacteria. *Infect Immun* **70**, 6215-22 (2002).

Stowell et al Supplemental Figure 1

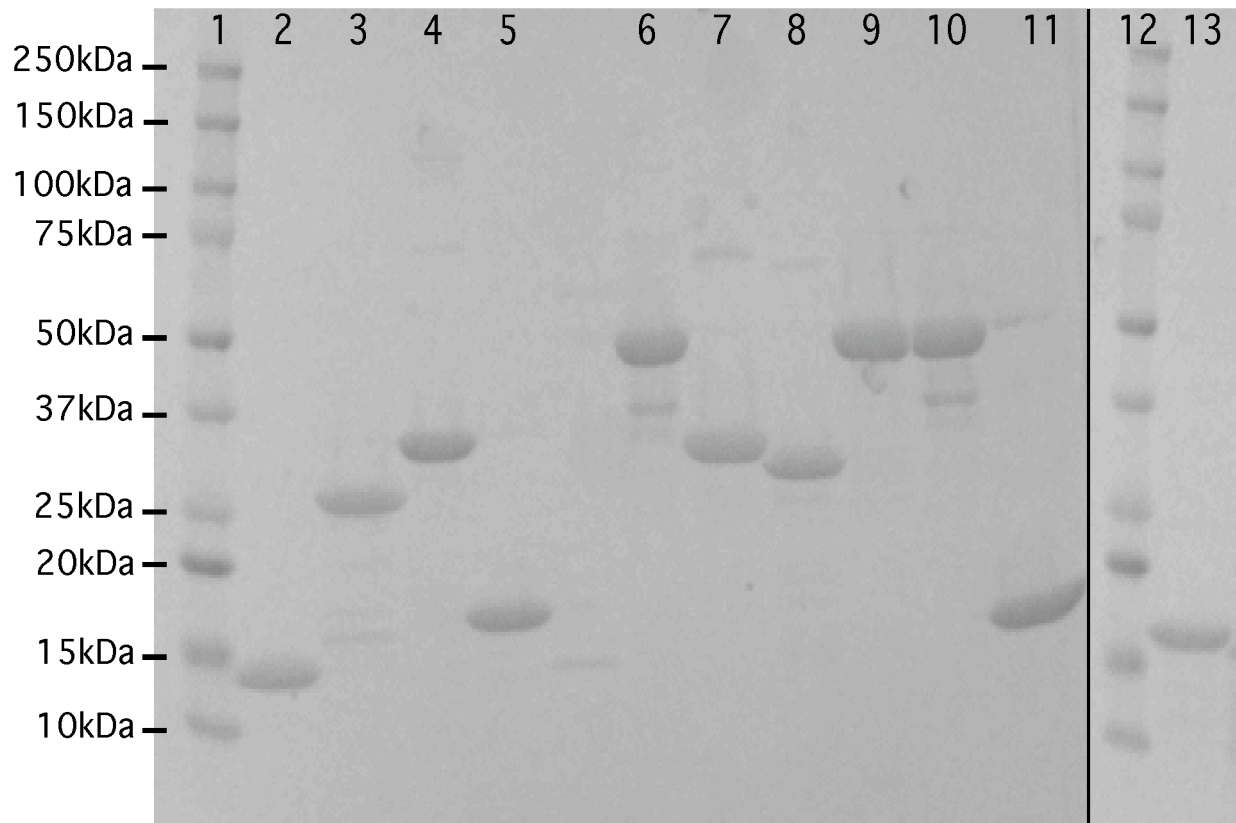

**Supplementary Figure 1. Purity of Galectins.** Coomassie blue staining of human (h) and mouse (m) galectin preparations on SDS-PAGE, 10 ug per well. Lane 1- Molecular weight markers, lane 2- hGal-1, lane 3- hGal-3, lane 4- hGal-4, lane 5- hGal-4N, lane 6- hGal-8, lane 7- hGal-8N, lane 8- hGal-8C, lane 9- hGal-8R69H, lane 10- hGal-8R223H, lane 11- mGal-4, lane 12- molecular weight markers, lane 13- hGal-4C.

**Supplementary video 1. Immobilization of BG B<sup>+</sup> *E. coli* after addition of Gal-8.**

(Below is a still shot as a placeholder and readers should access the video to make observations).

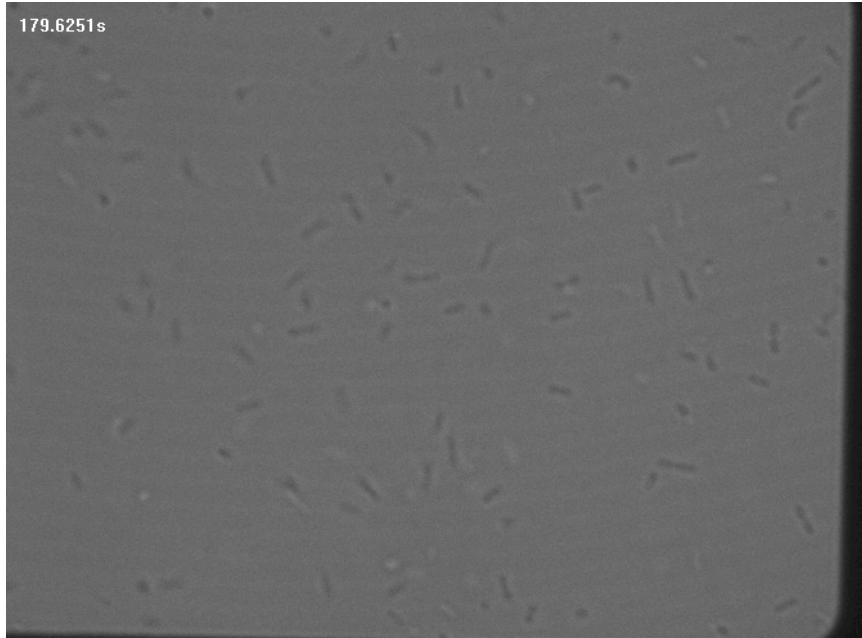

**Supplementary Table 1. Complete list of glycans present on the CFG glycan microarray and raw data for galectin binding.** Binding of human Gal-1 (0.2  $\mu$ M), -3 (0.2  $\mu$ M), -4 (0.5  $\mu$ M), and -8 (0.02  $\mu$ M), and mouse Gal-4 (0.2  $\mu$ M) to the array. Blue = blood group B type structures, Orange = blood group A type structures. RFU= relative fluorescence units, SEM= standard error of the mean of 4 replicates after removal of the high and low value for each glycan.

| #  | CFG Array Version 3.0 Structure                                                                                                                                                                 | Human Gal-1 |      | Human Gal-3 |     | Human Gal-4 |     | Human Gal-8 |     | Mouse Gal-4 |     |
|----|-------------------------------------------------------------------------------------------------------------------------------------------------------------------------------------------------|-------------|------|-------------|-----|-------------|-----|-------------|-----|-------------|-----|
|    |                                                                                                                                                                                                 | RFU         | SEM  | RFU         | SEM | RFU         | SEM | RFU         | SEM | RFU         | SEM |
| 1  | Neu5Ac $\alpha$ 2-8Neu5Ac $\alpha$ -Sp8                                                                                                                                                         | -107        | 90   | 27          | 35  | 17          | 6   | 22          | 13  | 51          | 6   |
| 2  | Neu5Ac $\alpha$ 2-8Neu5Ac $\beta$ -Sp17                                                                                                                                                         | -41         | 25   | 120         | 56  | 19          | 14  | 87          | 37  | 77          | 6   |
| 3  | Neu5Ac $\alpha$ 2-8Neu5Ac $\alpha$ 2-8Neu5Ac $\beta$ -Sp8                                                                                                                                       | 5           | 23   | 68          | 71  | 10          | 5   | 50          | 10  | 71          | 8   |
| 4  | Neu5Gc $\beta$ 2-6Gal $\beta$ 1-4GlcNAc-Sp8                                                                                                                                                     | 36          | 56   | 79          | 40  | 32          | 9   | 8           | 2   | 82          | 16  |
| 5  | Gal $\beta$ 1-3GlcNAc $\beta$ 1-2Man $\alpha$ 1-3(Gal $\beta$ 1-3GlcNAc $\beta$ 1-2Man $\alpha$ 1-6)Man $\beta$ 1-4GlcNAc $\beta$ 1-4GlcNAc $\beta$ -Sp19                                       | 175         | 41   | 186         | 65  | 37          | 4   | 17          | 9   | 117         | 13  |
| 6  | Neu5Ac $\alpha$ 2-6Gal $\beta$ 1-4GlcNAc $\beta$ 1-2Man $\alpha$ 1-3(Neu5Ac $\alpha$ 2-6Gal $\beta$ 1-4GlcNAc $\beta$ 1-2Man $\alpha$ 1-6)Man $\beta$ 1-4GlcNAc $\beta$ 1-4GlcNAc $\beta$ -Sp12 | 89          | 67   | -6          | 25  | 18          | 14  | 28          | 14  | 61          | 3   |
| 7  | $\alpha$ -D-Gal-Sp8                                                                                                                                                                             | 158         | 36   | 73          | 32  | 23          | 8   | 15          | 5   | 47          | 8   |
| 8  | $\alpha$ -D-Glc-Sp8                                                                                                                                                                             | -23         | 45   | 30          | 51  | 18          | 8   | 60          | 29  | 46          | 7   |
| 9  | $\alpha$ -D-Man-Sp8                                                                                                                                                                             | 85          | 45   | 79          | 21  | 25          | 9   | 32          | 6   | 28          | 4   |
| 10 | $\alpha$ -GalNAc-Sp8                                                                                                                                                                            | 9           | 120  | 60          | 92  | 29          | 13  | 23          | 7   | 87          | 9   |
| 11 | $\alpha$ -L-Fuc-Sp8                                                                                                                                                                             | 36          | 69   | 66          | 41  | 21          | 6   | 42          | 20  | 23          | 7   |
| 12 | $\alpha$ -L-Fuc-Sp9                                                                                                                                                                             | 116         | 153  | 9           | 32  | 18          | 6   | 14          | 23  | 93          | 12  |
| 13 | $\alpha$ -L-Rha-Sp8                                                                                                                                                                             | -36         | 57   | 26          | 21  | 107         | 11  | 38          | 18  | 52          | 6   |
| 14 | $\alpha$ -Neu5Ac-Sp8                                                                                                                                                                            | 32          | 33   | 48          | 17  | 57          | 17  | 85          | 42  | 83          | 12  |
| 15 | $\alpha$ -Neu5Ac-Sp11                                                                                                                                                                           | -36         | 27   | -23         | 13  | 27          | 3   | 22          | 7   | 96          | 17  |
| 16 | $\beta$ -Neu5Ac-Sp8                                                                                                                                                                             | -79         | 78   | 8           | 32  | 15          | 4   | 31          | 12  | 51          | 14  |
| 17 | $\beta$ -D-Gal-Sp8                                                                                                                                                                              | 66          | 19   | 101         | 59  | 17          | 8   | 45          | 23  | 64          | 11  |
| 18 | $\beta$ -D-Glc-Sp8                                                                                                                                                                              | 61          | 69   | 62          | 17  | 26          | 8   | 47          | 13  | 66          | 6   |
| 19 | $\beta$ -D-Man-Sp8                                                                                                                                                                              | 227         | 94   | 95          | 34  | 15          | 4   | 26          | 1   | 36          | 4   |
| 20 | $\beta$ -GalNAc-Sp8                                                                                                                                                                             | -79         | 47   | 156         | 211 | 32          | 4   | 28          | 14  | 47          | 21  |
| 21 | $\beta$ -GlcNAc-Sp0                                                                                                                                                                             | -2          | 22   | 47          | 12  | 13          | 9   | 39          | 15  | 63          | 23  |
| 22 | $\beta$ -GlcNAc-Sp8                                                                                                                                                                             | -21         | 31   | 58          | 78  | 9           | 5   | 44          | 21  | 55          | 10  |
| 23 | $\beta$ -GlcN(Gc)-Sp8                                                                                                                                                                           | 90          | 44   | 48          | 49  | 17          | 7   | 68          | 32  | 58          | 6   |
| 24 | Galb1-4GlcNAcb1-3(Galb1-4GlcNAcb1-6)GalNAca-Sp8                                                                                                                                                 | 7138        | 3013 | 79          | 14  | 17          | 4   | 75          | 6   | 84          | 10  |
| 25 | GlcNAc $\beta$ 1-3(GlcNAc $\beta$ 1-4)(GlcNAc $\beta$ 1-6)GlcNAc-Sp8                                                                                                                            | 17          | 51   | 105         | 89  | 71          | 8   | 15          | 7   | 72          | 5   |

|    |                                                                                                     |       |       |     |     |     |     |     |    |     |    |
|----|-----------------------------------------------------------------------------------------------------|-------|-------|-----|-----|-----|-----|-----|----|-----|----|
| 26 | [3OSO3][6OSO3]Galβ1-4[6OSO3]GlcNAcβ-Sp0                                                             | 30    | 35    | 182 | 148 | 20  | 5   | 29  | 9  | 112 | 10 |
| 27 | [3OSO3][6OSO3]Galβ1-4GlcNAcβ-Sp0                                                                    | -29   | 113   | 248 | 346 | 19  | 6   | 37  | 10 | 74  | 10 |
| 28 | [3OSO3]Galβ1-4Glcβ-Sp8                                                                              | 749   | 396   | 68  | 38  | 117 | 15  | 62  | 16 | 106 | 12 |
| 29 | [3OSO3]Galβ1-4(6OSO3)Glcβ-Sp0                                                                       | 2227  | 3008  | 674 | 70  | 607 | 181 | 361 | 69 | 134 | 14 |
| 30 | [3OSO3]Galβ1-4(6OSO3)Glcβ-Sp8                                                                       | 4809  | 1006  | 444 | 191 | 967 | 37  | 117 | 65 | 67  | 6  |
| 31 | [3OSO3]Galβ1-3(Fuca1-4)GlcNAcβ-Sp8                                                                  | -48   | 38    | 16  | 64  | 20  | 9   | 21  | 6  | 78  | 12 |
| 32 | [3OSO3]Galβ1-3GalNAcα-Sp8                                                                           | 37    | 88    | 75  | 39  | 385 | 83  | 65  | 15 | 77  | 16 |
| 33 | [3OSO3]Galβ1-3GlcNAcβ-Sp8                                                                           | 19099 | 3018  | 301 | 69  | 84  | 19  | 41  | 3  | 54  | 2  |
| 34 | [3OSO3]Galβ1-4(Fuca1-3)GlcNAcβ-Sp8                                                                  | 56    | 32    | 18  | 35  | 39  | 14  | 60  | 18 | 62  | 2  |
| 35 | [3OSO3]Galβ1-4[6OSO3]GlcNAcβ-Sp8                                                                    | 39931 | 4579  | 944 | 45  | -9  | 5   | 7   | 10 | 81  | 11 |
| 36 | [3OSO3]Galβ1-4GlcNAcβ-Sp0                                                                           | 13488 | 11547 | 354 | 40  | 25  | 10  | 40  | 9  | 78  | 11 |
| 37 | [3OSO3]Galβ1-4GlcNAcβ-Sp8                                                                           | 29310 | 5953  | 242 | 156 | 55  | 16  | 53  | 27 | 76  | 5  |
| 38 | [3OSO3]Galβ-Sp8                                                                                     | -123  | 58    | 7   | 41  | 20  | 7   | 20  | 10 | 76  | 11 |
| 39 | [4OSO3][6OSO3]Galβ1-4GlcNAcβ-Sp0                                                                    | 50    | 159   | 38  | 55  | 26  | 2   | 11  | 3  | 79  | 13 |
| 40 | [4OSO3]Galβ1-4GlcNAcβ-Sp8                                                                           | -53   | 43    | 36  | 21  | 3   | 5   | 28  | 13 | 33  | 22 |
| 41 | 6-H <sub>2</sub> PO <sub>3</sub> Manα-Sp8                                                           | 1135  | 120   | 139 | 41  | 11  | 4   | 31  | 14 | 65  | 19 |
| 42 | [6OSO3]Galβ1-4Glcβ-Sp0                                                                              | 600   | 291   | 87  | 40  | 11  | 9   | 48  | 31 | 38  | 6  |
| 43 | [6OSO3]Galβ1-4Glcβ-Sp8                                                                              | 193   | 77    | 682 | 114 | -12 | 4   | 21  | 8  | 133 | 26 |
| 44 | [6OSO3]Galβ1-4GlcNAcβ-Sp8                                                                           | 104   | 46    | 53  | 31  | 18  | 6   | 47  | 17 | 51  | 4  |
| 45 | [6OSO3]Galβ1-4[6OSO3]Glcβ-Sp8                                                                       | 267   | 76    | 209 | 26  | 15  | 9   | 70  | 26 | 138 | 14 |
| 46 | Neu5Acα2-3[6OSO3]Galβ1-4GlcNAcβ-Sp8                                                                 | 127   | 73    | 120 | 25  | 17  | 9   | 30  | 2  | 78  | 11 |
| 47 | [6OSO3]GlcNAcβ-Sp8                                                                                  | -8    | 31    | 20  | 18  | 28  | 3   | 20  | 13 | 71  | 4  |
| 48 | 9NAcNeu5Acα-Sp8                                                                                     | 63    | 66    | 59  | 57  | 21  | 7   | 13  | 18 | 70  | 9  |
| 49 | 9NAcNeu5Acα2-6Galβ1-4GlcNAcβ-Sp8                                                                    | 27    | 31    | 35  | 28  | 38  | 5   | 28  | 15 | 97  | 12 |
| 50 | Manα1-3(Manα1-6)Manβ1-4GlcNAcβ1-4GlcNAcβ-Sp13                                                       | 142   | 61    | 59  | 38  | 43  | 10  | 25  | 13 | 46  | 4  |
| 51 | GlcNAcβ1-2Manα1-3(GlcNAcβ1-2Manα1-6)Manβ1-4GlcNAcβ1-4GlcNAcβ-Sp13                                   | 97    | 35    | 42  | 67  | 21  | 2   | 93  | 27 | 50  | 15 |
| 52 | Galβ1-4GlcNAcβ1-2Manα1-3(Galβ1-4GlcNAcβ1-2Manα1-6)Manβ1-4GlcNAcβ1-4GlcNAcβ-Sp13                     | 47992 | 4892  | 1   | 43  | 0   | 0   | 0   | 23 | 0   | 0  |
| 53 | Neu5Acα2-6Galβ1-4GlcNAcβ1-2Manα1-3(Neu5Acα2-6Galβ1-4GlcNAcβ1-2Manα1-6)Manβ1-4GlcNAcβ1-4GlcNAcβ-Sp13 | -143  | 142   | 0   | 92  | 22  | 3   | 10  | 3  | 139 | 7  |
| 54 | Neu5Acα2-6Galβ1-4GlcNAcβ1-2Manα1-3(Neu5Acα2-6Galβ1-4GlcNAcβ1-2Manα1-6)Manβ1-4GlcNAcβ1-4GlcNAcβ-Sp8  | -52   | 30    | -18 | 87  | 10  | 8   | -3  | 4  | 116 | 11 |

|    |                                                                                        |      |      |      |     |      |     |      |     |       |     |
|----|----------------------------------------------------------------------------------------|------|------|------|-----|------|-----|------|-----|-------|-----|
| 55 | Fuca1-2Galβ1-3GalNAcβ1-3Galα-Sp9                                                       | 282  | 50   | 336  | 120 | 19   | 7   | 36   | 14  | 59    | 6   |
| 56 | Fuca1-2Galβ1-3GalNAcβ1-3Galα1-4Galβ1-4Glcβ-Sp9                                         | 95   | 113  | 53   | 78  | 38   | 17  | 41   | 5   | 50    | 12  |
| 57 | Fuca1-2Galβ1-3(Fuca1-4)GlcNAcβ-Sp8                                                     | 129  | 100  | 143  | 63  | 19   | 10  | 20   | 12  | 43    | 2   |
| 58 | Fuca1-2Galβ1-3GalNAcα-Sp8                                                              | -21  | 25   | 74   | 41  | 47   | 16  | 41   | 9   | 78    | 15  |
| 59 | Fuca1-2Galβ1-3GalNAcβ1-4(Neu5Aca2-3)Galβ1-4Glcβ-Sp0                                    | 22   | 18   | 70   | 75  | 23   | 6   | 157  | 29  | 62    | 13  |
| 60 | Fuca1-2Galβ1-3GalNAcβ1-4(Neu5Aca2-3)Galβ1-4Glcβ-Sp9                                    | 101  | 165  | 106  | 129 | 5    | 4   | 60   | 34  | 18    | 8   |
| 61 | Fuca1-2Galβ1-3GlcNAcβ1-3Galβ1-4Glcβ-Sp10                                               | 1268 | 627  | 165  | 117 | 28   | 8   | 64   | 15  | 75    | 7   |
| 62 | Fuca1-2Galβ1-3GlcNAcβ1-3Galβ1-4Glcβ-Sp8                                                | 796  | 495  | 230  | 136 | 373  | 17  | 27   | 5   | 76    | 7   |
| 63 | Fuca1-2Galβ1-3GlcNAcβ-Sp0                                                              | 197  | 79   | 198  | 109 | 16   | 24  | 10   | 6   | 68    | 11  |
| 64 | Fuca1-2Galβ1-3GlcNAcβ-Sp8                                                              | 154  | 91   | 128  | 100 | 5    | 1   | 30   | 19  | 74    | 15  |
| 65 | Fuca1-2Galβ1-4(Fuca1-3)GlcNAcβ1-3Galβ1-4(Fuca1-3)GlcNAcβ-Sp0                           | 26   | 14   | 23   | 36  | 22   | 13  | 44   | 21  | 99    | 12  |
| 66 | Fuca1-2Galβ1-4(Fuca1-3)GlcNAcβ1-3Galβ1-4(Fuca1-3)GlcNAcβ1-3Galβ1-4(Fuca1-3)GlcNAcβ-Sp0 | -31  | 47   | -12  | 39  | 6    | 1   | 65   | 34  | 54    | 9   |
| 67 | Fuca1-2Galβ1-4(Fuca1-3)GlcNAcβ-Sp0                                                     | 56   | 42   | 58   | 58  | 30   | 13  | 63   | 22  | 52    | 10  |
| 68 | Fuca1-2Galβ1-4(Fuca1-3)GlcNAcβ-Sp8                                                     | 35   | 150  | 74   | 22  | 11   | 6   | 74   | 13  | 71    | 18  |
| 69 | Fuca1-2Galβ1-4GlcNAcβ1-3Galβ1-4GlcNAc-Sp0                                              | 2656 | 285  | 1762 | 142 | 79   | 13  | 45   | 11  | 99    | 15  |
| 70 | Fuca1-2Galβ1-4GlcNAcβ1-3Galβ1-4GlcNAcβ1-3Galβ1-4GlcNAcβ-Sp0                            | 2616 | 1228 | 2488 | 495 | 18   | 5   | 19   | 8   | 85    | 13  |
| 71 | Fuca1-2Galβ1-4GlcNAcβ-Sp0                                                              | 93   | 143  | 71   | 71  | 10   | 1   | 17   | 9   | 42    | 7   |
| 72 | Fuca1-2Galβ1-4GlcNAcβ-Sp8                                                              | 357  | 178  | 48   | 22  | 6    | 4   | 22   | 12  | 37    | 17  |
| 73 | Fuca1-2Galβ1-4Glcβ-Sp0                                                                 | 91   | 80   | 35   | 32  | 83   | 12  | 95   | 24  | 51    | 13  |
| 74 | Fuca1-2Galβ-Sp8                                                                        | 9    | 11   | 59   | 24  | 28   | 16  | 46   | 12  | 65    | 13  |
| 75 | Fuca1-3GlcNAcβ-Sp8                                                                     | 62   | 79   | 59   | 59  | 26   | 3   | -3   | 10  | 35    | 12  |
| 76 | Fuca1-3GlcNAcβ-Sp8                                                                     | -36  | 73   | 38   | 49  | 26   | 3   | 38   | 32  | 35    | 12  |
| 77 | Fuca1-4GlcNAcβ-Sp8                                                                     | 92   | 53   | 75   | 32  | 35   | 16  | 27   | 9   | 56    | 3   |
| 78 | Fucβ1-3GlcNAcβ-Sp8                                                                     | 12   | 40   | 42   | 13  | 48   | 9   | 29   | 5   | 38    | 5   |
| 79 | GalNAca1-3(Fuca1-2)Galβ1-3GlcNAcβ-Sp0                                                  | 163  | 40   | 396  | 237 | 4664 | 523 | 254  | 81  | 13390 | 871 |
| 80 | GalNAca1-3(Fuca1-2)Galβ1-4(Fuca1-3)GlcNAcβ-Sp0                                         | 658  | 121  | 163  | 124 | 40   | 14  | 104  | 23  | 115   | 16  |
| 81 | GalNAca1-3(Fuca1-2)Galβ1-4GlcNAcβ-Sp0                                                  | 21   | 40   | 1133 | 129 | 443  | 35  | 7069 | 496 | 3798  | 175 |



|     |                                                                                       |      |     |       |      |      |      |      |     |      |     |
|-----|---------------------------------------------------------------------------------------|------|-----|-------|------|------|------|------|-----|------|-----|
| 82  | GalNAc $\alpha$ 1-3(Fuca1-2)Gal $\beta$ 1-4GlcNAc $\beta$ -Sp8                        | 78   | 56  | 1081  | 174  | 103  | 49   | 497  | 69  | 3495 | 50  |
| 83  | GalNAc $\alpha$ 1-3(Fuca1-2)Gal $\beta$ 1-4Glc $\beta$ -Sp0                           | 58   | 2   | 231   | 117  | 6841 | 1381 | 2223 | 170 | 4798 | 149 |
| 84  | GalNAc $\alpha$ 1-3(Fuca1-2)Gal $\beta$ -Sp8                                          | 152  | 79  | 178   | 22   | 20   | 3    | 47   | 6   | 49   | 8   |
| 85  | GalNAc $\alpha$ 1-3GalNAc $\beta$ -Sp8                                                | -157 | 23  | 72    | 22   | -2   | 15   | 75   | 12  | 33   | 9   |
| 86  | GalNAc $\alpha$ 1-3Gal $\beta$ -Sp8                                                   | -4   | 56  | 107   | 21   | 12   | 6    | 48   | 20  | 34   | 10  |
| 87  | GalNAc $\alpha$ 1-4(Fuca1-2)Gal $\beta$ 1-4GlcNAc $\beta$ -Sp8                        | 45   | 70  | 92    | 39   | 28   | 9    | 9    | 6   | 53   | 4   |
| 88  | GalNAc $\beta$ 1-3GalNAc $\alpha$ -Sp8                                                | 73   | 47  | 103   | 62   | 68   | 14   | 22   | 11  | 44   | 7   |
| 89  | GalNAc $\beta$ 1-3(Fuca1-2)Gal $\beta$ -Sp8                                           | 54   | 53  | 42    | 29   | 38   | 9    | 25   | 2   | 42   | 5   |
| 90  | GalNAc $\beta$ 1-3Gal $\alpha$ 1-4Gal $\beta$ 1-4GlcNAc $\beta$ -Sp0                  | 115  | 37  | 59    | 35   | 14   | 6    | 12   | 10  | 38   | 7   |
| 91  | GalNAc $\beta$ 1-4(Fuca1-3)GlcNAc $\beta$ -Sp0                                        | 24   | 141 | 132   | 94   | 28   | 8    | 61   | 18  | 42   | 10  |
| 92  | GalNAc $\beta$ 1-4GlcNAc $\beta$ -Sp0                                                 | 120  | 127 | 109   | 33   | 22   | 4    | 63   | 20  | 26   | 7   |
| 93  | GalNAc $\beta$ 1-4GlcNAc $\beta$ -Sp8                                                 | -14  | 13  | -12   | 39   | 47   | 18   | 19   | 4   | 21   | 6   |
| 94  | Gal $\alpha$ 1-2Gal $\beta$ -Sp8                                                      | 89   | 26  | 66    | 18   | 18   | 11   | 33   | 10  | 89   | 26  |
| 95  | Gal $\alpha$ 1-3(Fuca1-2)Gal $\beta$ 1-3GlcNAc $\beta$ -Sp0                           | 524  | 138 | 649   | 391  | 4807 | 168  | 8769 | 538 | 3847 | 165 |
| 96  | Gal $\alpha$ 1-3(Fuca1-2)Gal $\beta$ 1-4(Fuca1-3)GlcNAc $\beta$ -Sp0                  | 276  | 46  | 140   | 56   | 70   | 12   | 48   | 8   | 98   | 5   |
| 97  | Gal $\alpha$ 1-3(Fuca1-2)Gal $\beta$ 1-4GlcNAc $\beta$ -Sp0                           | -17  | 86  | 18681 | 9226 | 913  | 133  | 412  | 303 | 843  | 8   |
| 98  | Gal $\alpha$ 1-3(Fuca1-2)Gal $\beta$ 1-4Glc $\beta$ -Sp0                              | 47   | 16  | 161   | 27   | 4581 | 171  | 1058 | 54  | 798  | 32  |
| 99  | Gal $\alpha$ 1-3(Fuca1-2)Gal $\beta$ -Sp8                                             | 93   | 60  | 70    | 71   | 37   | 13   | 67   | 6   | 76   | 7   |
| 100 | Gal $\alpha$ 1-3(Gal $\alpha$ 1-4)Gal $\beta$ 1-4GlcNAc $\beta$ -Sp8                  | 129  | 67  | 107   | 72   | 14   | 9    | 36   | 8   | 106  | 11  |
| 101 | Gal $\alpha$ 1-3GalNAc $\alpha$ -Sp8                                                  | 73   | 60  | 53    | 51   | 7    | 6    | 6    | 5   | 71   | 14  |
| 102 | Gal $\alpha$ 1-3GalNAc $\beta$ -Sp8                                                   | 108  | 65  | 109   | 47   | 24   | 5    | 43   | 8   | 45   | 13  |
| 103 | Gal $\alpha$ 1-3Gal $\beta$ 1-4(Fuca1-3)GlcNAc $\beta$ -Sp8                           | -168 | 72  | 204   | 124  | 0    | 2    | 4    | 39  | 49   | 12  |
| 104 | Gal $\alpha$ 1-3Gal $\beta$ 1-3GlcNAc $\beta$ -Sp0                                    | 1014 | 58  | 22    | 27   | 54   | 10   | 35   | 19  | 89   | 10  |
| 105 | Gal $\alpha$ 1-3Gal $\beta$ 1-4GlcNAc $\beta$ -Sp8                                    | 952  | 578 | -18   | 76   | 20   | 9    | 26   | 5   | 72   | 11  |
| 106 | Gal $\alpha$ 1-3Gal $\beta$ 1-4Glc $\beta$ -Sp0                                       | 172  | 90  | 69    | 29   | 142  | 46   | 26   | 8   | 91   | 15  |
| 107 | Gal $\alpha$ 1-3Gal $\beta$ -Sp8                                                      | 66   | 78  | 75    | 29   | 9    | 2    | 40   | 12  | 79   | 1   |
| 108 | Gal $\alpha$ 1-4(Fuca1-2)Gal $\beta$ 1-4GlcNAc $\beta$ -Sp8                           | -15  | 42  | 35    | 45   | 50   | 8    | 234  | 137 | 55   | 5   |
| 109 | Gal $\alpha$ 1-4Gal $\beta$ 1-4GlcNAc $\beta$ -Sp0                                    | -20  | 41  | 52    | 38   | 39   | 11   | 27   | 16  | 75   | 19  |
| 110 | Gal $\alpha$ 1-4Gal $\beta$ 1-4GlcNAc $\beta$ -Sp8                                    | 21   | 68  | 87    | 18   | 32   | 5    | 32   | 20  | 51   | 8   |
| 111 | Gal $\alpha$ 1-4Gal $\beta$ 1-4Glc $\beta$ -Sp0                                       | 559  | 626 | 51    | 4    | 59   | 19   | 17   | 9   | 33   | 7   |
| 112 | Gal $\alpha$ 1-4GlcNAc $\beta$ -Sp8                                                   | 95   | 109 | 42    | 24   | 14   | 5    | 82   | 26  | 52   | 6   |
| 113 | Gal $\alpha$ 1-6Glc $\beta$ -Sp8                                                      | 63   | 87  | 54    | 30   | 8    | 3    | 8    | 5   | 44   | 13  |
| 114 | Gal $\beta$ 1-2Gal $\beta$ -Sp8                                                       | 138  | 122 | 57    | 27   | 9    | 8    | 78   | 40  | 49   | 5   |
| 115 | Gal $\beta$ 1-3(Fuca1-4)GlcNAc $\beta$ 1-3Gal $\beta$ 1-4(Fuca1-3)GlcNAc $\beta$ -Sp0 | -57  | 106 | 26    | 29   | 29   | 8    | 45   | 20  | 59   | 13  |
| 116 | Gal $\beta$ 1-3(Fuca1-4)GlcNAc $\beta$ 1-3Gal $\beta$ 1-4GlcNAc $\beta$ -Sp0          | 967  | 325 | 59    | 62   | 43   | 8    | 27   | 8   | 48   | 4   |

|     |                                                                                                     |       |      |      |     |      |    |     |     |      |     |
|-----|-----------------------------------------------------------------------------------------------------|-------|------|------|-----|------|----|-----|-----|------|-----|
| 117 | Galβ1-3(Fuca1-4)GlcNAc–Sp0                                                                          | 0     | 28   | 47   | 39  | 51   | 16 | 39  | 8   | 60   | 11  |
| 118 | Galβ1-3(Fuca1-4)GlcNAc–Sp8                                                                          | 30    | 26   | 43   | 10  | 50   | 10 | 48  | 16  | 59   | 13  |
| 119 | Galβ1-3(Fuca1-4)GlcNAcβ–Sp8                                                                         | 55    | 61   | 127  | 193 | 49   | 14 | 8   | 9   | 69   | 24  |
| 120 | Galβ1-3(Galβ1-4GlcNAcβ1-6)GalNAcα–Sp8                                                               | 184   | 161  | 35   | 42  | 17   | 7  | 8   | 5   | 44   | 11  |
| 121 | Galβ1-3(GlcNAcβ1-6)GalNAcα–Sp8                                                                      | -11   | 148  | 30   | 64  | 26   | 8  | 6   | 14  | 60   | 16  |
| 122 | Galβ1-3(Neu5Acα2-6)GalNAcα–Sp8                                                                      | 21    | 32   | 74   | 34  | 10   | 10 | 3   | 4   | 103  | 4   |
| 123 | Galβ1-3(Neu5Acβ2-6)GalNAcα–Sp8                                                                      | 4     | 19   | 46   | 25  | 8    | 5  | 26  | 15  | 48   | 10  |
| 124 | Galβ1-3(Neu5Acα2-6)GlcNAcβ1-4Galβ1-4Glcβ–Sp10                                                       | 122   | 116  | 50   | 92  | 46   | 5  | 68  | 32  | 79   | 11  |
| 125 | Galβ1-3GalNAcα–Sp8                                                                                  | 126   | 93   | 50   | 47  | 2    | 3  | 9   | 10  | 32   | 7   |
| 126 | Galβ1-3GalNAcβ–Sp8                                                                                  | 52    | 77   | 105  | 46  | 57   | 16 | 30  | 18  | 51   | 11  |
| 127 | Galβ1-3GalNAcβ1-3Galα1-4Galβ1-4Glcβ–Sp0                                                             | 31    | 161  | -26  | 31  | 37   | 12 | -10 | 5   | 89   | 12  |
| 128 | Galβ1-3GalNAcβ1-4(Neu5Acα2-3)Galβ1-4Glcβ–Sp0                                                        | 46    | 65   | 97   | 82  | 16   | 8  | 26  | 9   | 80   | 12  |
| 129 | Galβ1-3GalNAcβ1-4Galβ1-4Glcβ–Sp8                                                                    | 8     | 38   | 60   | 80  | 18   | 13 | 50  | 11  | 1256 | 84  |
| 130 | Galβ1-3Galβ–Sp8                                                                                     | 75    | 60   | 47   | 35  | 439  | 55 | 28  | 6   | 36   | 7   |
| 131 | Galβ1-3GlcNAcβ1-3Galβ1-4GlcNAcβ–Sp0                                                                 | 692   | 74   | 192  | 36  | 45   | 18 | 74  | 19  | 52   | 12  |
| 132 | Galβ1-3GlcNAcβ1-3Galβ1-4Glcβ–Sp10                                                                   | 1117  | 82   | 204  | 44  | 1012 | 25 | 34  | 18  | 60   | 12  |
| 133 | Galβ1-3GlcNAcβ–Sp0                                                                                  | 545   | 264  | 58   | 23  | 33   | 12 | 33  | 15  | 65   | 6   |
| 134 | Galβ1-3GlcNAcβ–Sp8                                                                                  | 480   | 220  | 63   | 19  | 16   | 3  | 7   | 12  | 48   | 3   |
| 135 | Galβ1-4(Fuca1-3)GlcNAcβ–Sp0                                                                         | 125   | 29   | 133  | 49  | 13   | 9  | 45  | 25  | 47   | 13  |
| 136 | Galβ1-4(Fuca1-3)GlcNAcβ–Sp8                                                                         | 5504  | 1179 | 103  | 80  | 42   | 14 | 44  | 17  | 70   | 12  |
| 137 | Galβ1-4(Fuca1-3)GlcNAcβ1-4Galβ1-4(Fuca1-3)GlcNAcβ–Sp0                                               | 74    | 166  | 25   | 36  | 22   | 5  | 39  | 6   | 50   | 6   |
| 138 | Galβ1-4(Fuca1-3)GlcNAcβ1-4Galβ1-4(Fuca1-3)GlcNAcβ1-4Galβ1-4(Fuca1-3)GlcNAcβ–Sp0                     | -59   | 30   | 66   | 50  | 23   | 8  | 23  | 15  | 78   | 5   |
| 139 | Galβ1-4[6OSO3]Glcβ–Sp0                                                                              | 72    | 44   | 176  | 114 | 108  | 10 | 57  | 14  | 70   | 6   |
| 140 | Galβ1-4[6OSO3]Glcβ–Sp8                                                                              | 91    | 78   | 35   | 13  | 80   | 25 | 39  | 13  | 110  | 8   |
| 141 | Galβ1-4GalNAcα1-3(Fuca1-2)Galβ1-4GlcNAcβ–Sp8                                                        | 51    | 75   | 1548 | 155 | 1840 | 64 | 114 | 36  | 5993 | 279 |
| 142 | Galβ1-4GalNAcβ1-3(Fuca1-2)Galβ1-4GlcNAcβ–Sp8                                                        | 168   | 161  | 34   | 41  | 3    | 2  | 23  | 2   | 155  | 41  |
| 143 | Neu5Acα2-3Galβ1-4GlcNAcβ1-2Manα1-3(Neu5Acα2-3Galβ1-4GlcNAcβ1-2Manα1-6)Manβ1-4GlcNAcβ1-4GlcNAcβ–Sp12 | 13707 | 1281 | 12   | 49  | 35   | 7  | 397 | 390 | 100  | 17  |
| 144 | Galβ1-4GlcNAcβ1-3GalNAcα–Sp8                                                                        | 1813  | 350  | 33   | 48  | 10   | 13 | 2   | 5   | 117  | 10  |

|     |                                                                        |      |     |      |      |     |    |      |     |     |    |
|-----|------------------------------------------------------------------------|------|-----|------|------|-----|----|------|-----|-----|----|
| 145 | Galβ1-4GlcNAcβ1-3Galβ1-4(Fuca1-3)GlcNAcβ1-3Galβ1-4(Fuca1-3)GlcNAcβ-Sp0 | 1456 | 94  | 84   | 58   | 18  | 6  | 10   | 5   | 33  | 10 |
| 146 | Galβ1-4GlcNAcβ1-3Galβ1-4GlcNAcβ1-3Galβ1-4GlcNAcβ-Sp0                   | 1313 | 619 | 6295 | 2113 | 20  | 4  | 1662 | 152 | 38  | 9  |
| 147 | Galβ1-4GlcNAcβ1-3Galβ1-4GlcNAcβ-Sp0                                    | 3025 | 531 | 1386 | 25   | 44  | 8  | 33   | 11  | 38  | 7  |
| 148 | Galβ1-4GlcNAcβ1-3Galβ1-4Glcβ-Sp0                                       | 365  | 309 | 464  | 73   | 18  | 7  | 477  | 137 | 35  | 5  |
| 149 | Galβ1-4GlcNAcβ1-3Galβ1-4Glcβ-Sp8                                       | 426  | 195 | 413  | 276  | 151 | 23 | 229  | 59  | 81  | 6  |
| 150 | Galβ1-4GlcNAcβ1-6(Galβ1-3)GalNAcα-Sp8                                  | 76   | 54  | 10   | 21   | 5   | 2  | 54   | 29  | 38  | 5  |
| 151 | Galβ1-4GlcNAcβ1-6GalNAcα-Sp8                                           | 446  | 57  | 37   | 35   | 22  | 7  | 32   | 11  | 75  | 3  |
| 152 | Galβ1-4GlcNAcβ-Sp0                                                     | 62   | 26  | 48   | 17   | 20  | 9  | 47   | 5   | 46  | 5  |
| 153 | Galβ1-4GlcNAcβ-Sp8                                                     | 297  | 207 | 54   | 22   | 21  | 6  | 46   | 22  | 66  | 9  |
| 154 | Galβ1-4Glcβ-Sp0                                                        | 42   | 35  | 103  | 30   | 13  | 17 | 30   | 11  | 50  | 12 |
| 155 | Galβ1-4Glcβ-Sp8                                                        | 111  | 21  | 43   | 55   | 26  | 9  | 32   | 7   | 112 | 61 |
| 156 | GlcNAcα1-3Galβ1-4GlcNAcβ-Sp8                                           | -33  | 49  | 565  | 1012 | 19  | 9  | 37   | 31  | 53  | 8  |
| 157 | GlcNAcα1-6Galβ1-4GlcNAcβ-Sp8                                           | -9   | 32  | 66   | 53   | 23  | 8  | 21   | 12  | 50  | 3  |
| 158 | GlcNAcβ1-2Galβ1-3GalNAcα-Sp8                                           | -16  | 9   | 48   | 82   | 43  | 15 | 37   | 19  | 35  | 6  |
| 159 | GlcNAcβ1-3(GlcNAcβ1-6)GalNAcα-Sp8                                      | 18   | 114 | 65   | 63   | 54  | 18 | 42   | 24  | 64  | 7  |
| 160 | GlcNAcβ1-3(GlcNAcβ1-6)Galβ1-4GlcNAcβ-Sp8                               | 39   | 85  | 81   | 64   | 1   | 5  | 37   | 7   | 33  | 8  |
| 161 | GlcNAcβ1-3GalNAcα-Sp8                                                  | 40   | 90  | 79   | 49   | 9   | 5  | 25   | 7   | 41  | 2  |
| 162 | GlcNAcβ1-3Galβ-Sp8                                                     | -92  | 28  | 30   | 56   | 37  | 9  | 18   | 9   | 39  | 6  |
| 163 | GlcNAcβ1-3Galβ1-3GalNAcα-Sp8                                           | -3   | 60  | 152  | 165  | 51  | 13 | 38   | 9   | 74  | 5  |
| 164 | GlcNAcβ1-3Galβ1-4GlcNAcβ-Sp0                                           | 232  | 22  | 324  | 140  | 31  | 10 | 74   | 25  | 58  | 14 |
| 165 | GlcNAcβ1-3Galβ1-4GlcNAcβ-Sp8                                           | 43   | 115 | 122  | 90   | 26  | 8  | 24   | 14  | 50  | 15 |
| 166 | GlcNAcβ1-3Galβ1-4GlcNAcβ1-3Galβ1-4GlcNAcβ-Sp0                          | -2   | 55  | 2135 | 1550 | 36  | 15 | 147  | 41  | 75  | 11 |
| 167 | GlcNAcβ1-3Galβ1-4Glcβ-Sp0                                              | 47   | 61  | 40   | 29   | 36  | 8  | 48   | 31  | 40  | 11 |
| 168 | GlcNAcβ1-4MDPLys                                                       | -16  | 108 | 17   | 67   | 20  | 12 | 28   | 15  | 64  | 2  |
| 169 | GlcNAcβ1-4(GlcNAcβ1-6)GalNAcα-Sp8                                      | 320  | 244 | 25   | 25   | 9   | 7  | 19   | 11  | 115 | 16 |
| 170 | GlcNAcβ1-4Galβ1-4GlcNAcβ-Sp8                                           | 50   | 29  | -21  | 18   | 6   | 5  | 3    | 7   | 70  | 17 |
| 171 | (GlcNAcβ1-4)6β-Sp8                                                     | 124  | 54  | 93   | 32   | 12  | 6  | 21   | 11  | 58  | 7  |
| 172 | (GlcNAcβ1-4)5β-Sp8                                                     | 62   | 63  | 69   | 64   | 7   | 5  | 14   | 6   | 32  | 6  |
| 173 | GlcNAcβ1-4GlcNAcβ1-4GlcNAcβ-Sp8                                        | 34   | 41  | 33   | 43   | 4   | 5  | 23   | 13  | 63  | 13 |
| 174 | GlcNAcβ1-6(Galβ1-3)GalNAcα-Sp8                                         | -158 | 56  | 43   | 17   | 30  | 7  | 78   | 26  | 50  | 15 |
| 175 | GlcNAcβ1-6GalNAcα-Sp8                                                  | 10   | 64  | 135  | 36   | 20  | 5  | 32   | 11  | 11  | 3  |
| 176 | GlcNAcβ1-6Galβ1-4GlcNAcβ-Sp8                                           | 127  | 88  | 76   | 114  | 17  | 5  | 37   | 7   | 104 | 14 |
| 177 | Glcα1-4Glcβ-Sp8                                                        | 104  | 171 | 62   | 65   | 6   | 9  | 41   | 17  | 49  | 13 |

|     |                                                                                                                                                                                                 |      |     |      |     |     |    |     |    |     |    |
|-----|-------------------------------------------------------------------------------------------------------------------------------------------------------------------------------------------------|------|-----|------|-----|-----|----|-----|----|-----|----|
| 178 | Glc $\alpha$ 1-4Glc $\alpha$ -Sp8                                                                                                                                                               | 91   | 70  | 83   | 24  | 25  | 16 | 21  | 14 | 72  | 16 |
| 179 | Glc $\alpha$ 1-6Glc $\alpha$ 1-6Glc $\beta$ -Sp8                                                                                                                                                | 174  | 50  | 42   | 40  | -5  | 8  | 27  | 8  | 24  | 4  |
| 180 | Glc $\beta$ 1-4Glc $\beta$ -Sp8                                                                                                                                                                 | -209 | 159 | 646  | 779 | 3   | 2  | 40  | 53 | 87  | 6  |
| 181 | Glc $\beta$ 1-6Glc $\beta$ -Sp8                                                                                                                                                                 | 84   | 39  | -19  | 76  | 30  | 14 | 18  | 3  | 15  | 5  |
| 182 | G-ol-Sp8                                                                                                                                                                                        | 52   | 129 | 40   | 24  | 38  | 21 | 23  | 22 | 64  | 11 |
| 183 | GlcA $\alpha$ -Sp8                                                                                                                                                                              | 92   | 44  | 114  | 45  | 17  | 10 | 52  | 2  | 45  | 7  |
| 184 | GlcA $\beta$ -Sp8                                                                                                                                                                               | 4460 | 580 | 1153 | 295 | 37  | 15 | 207 | 97 | 123 | 21 |
| 185 | GlcA $\beta$ 1-3Gal $\beta$ -Sp8                                                                                                                                                                | 238  | 143 | 50   | 46  | 33  | 11 | 36  | 8  | 46  | 6  |
| 186 | GlcA $\beta$ 1-6Gal $\beta$ -Sp8                                                                                                                                                                | 60   | 38  | -15  | 14  | 31  | 14 | 37  | 16 | 30  | 5  |
| 187 | KDN $\alpha$ 2-3Gal $\beta$ 1-3GlcNAc $\beta$ -Sp0                                                                                                                                              | 316  | 91  | 129  | 45  | 28  | 10 | 39  | 11 | 74  | 6  |
| 188 | KDN $\alpha$ 2-3Gal $\beta$ 1-4GlcNAc $\beta$ -Sp0                                                                                                                                              | 191  | 108 | 78   | 25  | 24  | 6  | 29  | 12 | 85  | 12 |
| 189 | Man $\alpha$ 1-2Man $\alpha$ 1-2Man $\alpha$ 1-3Man $\alpha$ -Sp9                                                                                                                               | -38  | 40  | -26  | 25  | 42  | 8  | 15  | 12 | 140 | 20 |
| 190 | Man $\alpha$ 1-2Man $\alpha$ 1-3(Man $\alpha$ 1-2Man $\alpha$ 1-6)Man $\alpha$ -Sp9                                                                                                             | 8    | 76  | 36   | 34  | 23  | 4  | 35  | 11 | 85  | 13 |
| 191 | Man $\alpha$ 1-2Man $\alpha$ 1-3Man $\alpha$ -Sp9                                                                                                                                               | -32  | 32  | 63   | 55  | 50  | 9  | 17  | 11 | 88  | 19 |
| 192 | Man $\alpha$ 1-6(Man $\alpha$ 1-2Man $\alpha$ 1-3)Man $\alpha$ 1-6(Man $\alpha$ 1-2Man $\alpha$ 1-3)Man $\beta$ 1-4GlcNAc $\beta$ 1-4GlcNAc $\beta$ -Sp12                                       | 80   | 108 | 53   | 75  | 12  | 8  | 18  | 7  | 149 | 9  |
| 193 | Man $\alpha$ 1-2Man $\alpha$ 1-6(Man $\alpha$ 1-3)Man $\alpha$ 1-6(Man $\alpha$ 1-2Man $\alpha$ 1-2Man $\alpha$ 1-3)Man $\beta$ 1-4GlcNAc $\beta$ 1-4GlcNAc $\beta$ -Sp12                       | -30  | 80  | 77   | 20  | 9   | 2  | 27  | 11 | 100 | 6  |
| 194 | Man $\alpha$ 1-2Man $\alpha$ 1-2Man $\alpha$ 1-3(Man $\alpha$ 1-2Man $\alpha$ 1-3(Man $\alpha$ 1-2Man $\alpha$ 1-6)Man $\alpha$ 1-6)Man $\beta$ 1-4GlcNAc $\beta$ 1-4GlcNAc $\beta$ -Sp12       | 478  | 645 | 368  | 242 | 54  | 14 | 247 | 21 | 157 | 9  |
| 195 | Man $\alpha$ 1-3(Man $\alpha$ 1-6)Man $\alpha$ -Sp9                                                                                                                                             | 4    | 57  | 72   | 31  | 19  | 5  | 26  | 2  | 35  | 5  |
| 196 | Man $\alpha$ 1-3(Man $\alpha$ 1-2Man $\alpha$ 1-2Man $\alpha$ 1-6)Man $\alpha$ -Sp9                                                                                                             | 73   | 190 | 53   | 47  | 19  | 4  | 37  | 13 | 78  | 27 |
| 197 | Man $\alpha$ 1-6(Man $\alpha$ 1-3)Man $\alpha$ 1-6(Man $\alpha$ 1-2Man $\alpha$ 1-3)Man $\beta$ 1-4GlcNAc $\beta$ 1-4GlcNAc $\beta$ -Sp12                                                       | 2977 | 539 | 1966 | 40  | 239 | 20 | 110 | 24 | 277 | 26 |
| 198 | Man $\alpha$ 1-6(Man $\alpha$ 1-3)Man $\alpha$ 1-6(Man $\alpha$ 1-3)Man $\beta$ 1-4GlcNAc $\beta$ 1-4GlcNAc $\beta$ -Sp12                                                                       | 17   | 64  | 82   | 68  | 16  | 8  | 27  | 10 | 95  | 15 |
| 199 | Neu5Ac $\alpha$ 2-6Gal $\beta$ 1-4GlcNAc $\beta$ 1-2Man $\alpha$ 1-3(Neu5Ac $\alpha$ 2-3Gal $\beta$ 1-4GlcNAc $\beta$ 1-2Man $\alpha$ 1-6)Man $\beta$ 1-4GlcNAc $\beta$ 1-4GlcNAc $\beta$ -Sp12 | 1100 | 92  | 124  | 60  | 81  | 12 | 34  | 35 | 36  | 22 |
| 200 | Man $\beta$ 1-4GlcNAc $\beta$ -Sp0                                                                                                                                                              | -49  | 46  | 26   | 34  | 12  | 7  | 12  | 10 | 51  | 11 |
| 201 | Fuc $\alpha$ 1-3(Gal $\beta$ 1-4)GlcNAc $\beta$ 1-2Man $\alpha$ 1-3(Fuc $\alpha$ 1-3(Gal $\beta$ 1-4)GlcNAc $\beta$ 1-2Man $\alpha$ 1-6)Man $\beta$ 1-4GlcNAc $\beta$ 1-4GlcNAc $\beta$ -Sp20   | 55   | 66  | 85   | 108 | 22  | 8  | 20  | 14 | 90  | 6  |

|     |                                                                     |     |     |     |      |    |    |     |     |     |    |
|-----|---------------------------------------------------------------------|-----|-----|-----|------|----|----|-----|-----|-----|----|
| 202 | Neu5Aca2-3Galβ1-3GalNAca-Sp8                                        | 45  | 61  | 73  | 48   | 60 | 13 | 50  | 16  | 33  | 3  |
| 203 | Neu5Aca2-8Neu5Aca2-8Neu5Aca2-8Neu5Aca2-3(GalNAcβ1-4)Galβ1-4Glcβ-Sp0 | 78  | 54  | 225 | 25   | 25 | 9  | 38  | 11  | 111 | 8  |
| 204 | Neu5Aca2-8Neu5Aca2-8Neu5Aca2-3(GalNAcβ1-4)Galβ1-4Glcβ-Sp0           | 996 | 665 | 435 | 310  | 65 | 13 | 236 | 12  | 57  | 18 |
| 205 | Neu5Aca2-8Neu5Aca2-8Neu5Aca2-3Galβ1-4Glcβ-Sp0                       | 76  | 89  | 284 | 241  | 13 | 5  | 22  | 4   | 35  | 12 |
| 206 | Neu5Aca2-8Neu5Aca2-3(GalNAcβ1-4)Galβ1-4Glcβ-Sp0                     | 44  | 33  | -3  | 26   | 11 | 11 | 5   | 6   | 34  | 8  |
| 207 | Neu5Aca2-8Neu5Aca2-8Neu5Aca-Sp8                                     | 64  | 48  | 95  | 48   | 25 | 8  | 9   | 3   | 68  | 13 |
| 208 | Neu5Aca2-3(6-O-Su)Galβ1-4(Fuca1-3)GlcNAcβ-Sp8                       | 91  | 56  | -35 | 39   | 18 | 17 | 7   | 6   | 85  | 12 |
| 209 | Neu5Aca2-3(GalNAcβ1-4)Galβ1-4GlcNAcβ-Sp0                            | 26  | 42  | 103 | 43   | 24 | 10 | 47  | 8   | 92  | 17 |
| 210 | Neu5Aca2-3(GalNAcβ1-4)Galβ1-4GlcNAcβ-Sp8                            | 89  | 48  | 58  | 27   | 20 | 7  | 73  | 22  | 109 | 7  |
| 211 | Neu5Aca2-3(GalNAcβ1-4)Galβ1-4Glcβ-Sp0                               | 98  | 90  | 61  | 56   | 21 | 15 | 21  | 6   | 79  | 14 |
| 212 | Neu5Aca2-3(NeuAca2-3Galβ1-3GalNAcβ1-4)Galβ1-4Glcβ-Sp0               | 536 | 127 | 548 | 272  | 37 | 8  | 62  | 13  | 178 | 58 |
| 213 | Neu5Aca2-3(Neu5Aca2-6)GalNAca-Sp8                                   | -95 | 66  | 118 | 94   | 12 | 6  | 14  | 3   | 108 | 12 |
| 214 | Neu5Aca2-3GalNAca-Sp8                                               | -28 | 30  | 18  | 32   | 10 | 11 | 13  | 4   | 60  | 9  |
| 215 | Neu5Aca2-3GalNAcβ1-4GlcNAcβ-Sp0                                     | 186 | 43  | 188 | 46   | 15 | 5  | 61  | 7   | 88  | 4  |
| 216 | Neu5Aca2-3Galβ1-3(6OSO3)GlcNAc-Sp8                                  | 977 | 655 | 992 | 658  | 62 | 22 | 427 | 182 | 103 | 12 |
| 217 | Neu5Aca2-3Galβ1-3(Fuca1-4)GlcNAcβ-Sp8                               | 39  | 36  | 74  | 89   | 0  | 3  | 35  | 14  | 40  | 17 |
| 218 | Neu5Aca2-3Galβ1-3(Fuca1-4)GlcNAcβ1-3Galβ1-4(Fuca1-3)GlcNAcβ Sp0     | 204 | 37  | 55  | 82   | 21 | 5  | 36  | 12  | 82  | 7  |
| 219 | Neu5Aca2-3Galβ1-3(Neu5Aca2-3Galβ1-4)GlcNAcβ-Sp8                     | -44 | 112 | 762 | 1495 | 22 | 4  | 70  | 25  | 63  | 14 |
| 220 | Neu5Aca2-3Galβ1-3[6OSO3]GalNAca-Sp8                                 | 33  | 68  | 42  | 42   | 32 | 17 | 36  | 7   | 68  | 10 |
| 221 | Neu5Aca2-3Galβ1-3(Neu5Aca2-6)GalNAca-Sp8                            | -96 | 70  | 78  | 47   | 12 | 3  | 47  | 16  | 103 | 10 |
| 222 | Neu5Aca2-3Galβ-Sp8                                                  | 133 | 87  | 82  | 103  | 46 | 22 | 89  | 14  | 53  | 11 |
| 223 | Neu5Aca2-3Galβ1-3GalNAcβ1-3Galα1-4Galβ1-4Glcβ-Sp0                   | 231 | 57  | 153 | 46   | 76 | 18 | 82  | 8   | 85  | 14 |
| 224 | Neu5Aca2-3Galβ1-3GlcNAcβ1-3Galβ1-4GlcNAcβ-Sp0                       | 166 | 149 | 240 | 140  | 21 | 6  | 28  | 3   | 53  | 5  |
| 225 | Neu5Aca2-3Galβ1-3GlcNAcβ-Sp0                                        | 150 | 114 | 67  | 34   | 47 | 10 | 19  | 6   | 52  | 5  |
| 226 | Neu5Aca2-3Galβ1-3GlcNAcβ-Sp8                                        | 158 | 98  | 55  | 52   | 23 | 3  | 39  | 12  | 75  | 12 |
| 227 | Neu5Aca2-3Galβ1-4[6OSO3]GlcNAcβ-Sp8                                 | 900 | 273 | 213 | 73   | 37 | 15 | 43  | 21  | 43  | 7  |

|     |                                                                                                                                                                    |      |     |      |     |    |    |     |    |     |    |
|-----|--------------------------------------------------------------------------------------------------------------------------------------------------------------------|------|-----|------|-----|----|----|-----|----|-----|----|
| 228 | Neu5Ac $\alpha$ 2-3Gal $\beta$ 1-4(Fuca1-3)(6OSO3)GlcNAc $\beta$ -Sp8                                                                                              | 119  | 91  | -2   | 34  | 27 | 8  | 39  | 15 | 75  | 5  |
| 229 | Neu5Ac $\alpha$ 2-3Gal $\beta$ 1-4(Fuca1-3)GlcNAc $\beta$ 1-3Gal $\beta$ 1-4(Fuca1-3)GlcNAc $\beta$ -Sp0                                                           | -47  | 186 | 475  | 322 | -8 | 3  | 301 | 44 | 31  | 13 |
| 230 | Neu5Ac $\alpha$ 2-3Gal $\beta$ 1-4(Fuca1-3)GlcNAc $\beta$ -Sp0                                                                                                     | 77   | 75  | -6   | 34  | 16 | 1  | 5   | 7  | 45  | 3  |
| 231 | Neu5Ac $\alpha$ 2-3Gal $\beta$ 1-4(Fuca1-3)GlcNAc $\beta$ -Sp8                                                                                                     | -92  | 23  | -138 | 95  | 19 | 3  | 38  | 16 | 81  | 10 |
| 232 | Neu5Ac $\alpha$ 2-3Gal $\beta$ 1-4(Fuca1-3)GlcNAc $\beta$ 1-3Gal $\beta$ -Sp8                                                                                      | 16   | 88  | 5    | 7   | 8  | 3  | 28  | 8  | 57  | 7  |
| 233 | Neu5Ac $\alpha$ 2-3Gal $\beta$ 1-4(Fuca1-3)GlcNAc $\beta$ 1-3Gal $\beta$ 1-4GlcNAc $\beta$ -Sp8                                                                    | 50   | 21  | 165  | 124 | 90 | 11 | 97  | 47 | 157 | 21 |
| 234 | Neu5Ac $\alpha$ 2-3Gal $\beta$ 1-4GlcNAc $\beta$ 1-3Gal $\beta$ 1-4(Fuca1-3)GlcNAc-Sp0                                                                             | 4    | 83  | 56   | 89  | 39 | 15 | 36  | 11 | 91  | 27 |
| 235 | Neu5Ac $\alpha$ 2-3Gal $\beta$ 1-4GlcNAc $\beta$ 1-3Gal $\beta$ 1-4GlcNAc $\beta$ 1-3Gal $\beta$ 1-4GlcNAc $\beta$ -Sp0                                            | 2105 | 616 | 1730 | 47  | 17 | 3  | 35  | 11 | 92  | 15 |
| 236 | Neu5Ac $\alpha$ 2-3Gal $\beta$ 1-4GlcNAc $\beta$ -Sp0                                                                                                              | 367  | 112 | 62   | 20  | 11 | 10 | 23  | 5  | 83  | 14 |
| 237 | Neu5Ac $\alpha$ 2-3Gal $\beta$ 1-4GlcNAc $\beta$ -Sp8                                                                                                              | 119  | 40  | 43   | 16  | 33 | 9  | 12  | 4  | 0   | 0  |
| 238 | Neu5Ac $\alpha$ 2-3Gal $\beta$ 1-4GlcNAc $\beta$ 1-3Gal $\beta$ 1-4GlcNAc $\beta$ -Sp0                                                                             | 738  | 631 | 147  | 53  | 27 | 6  | 42  | 8  | 46  | 6  |
| 239 | Neu5Ac $\alpha$ 2-3Gal $\beta$ 1-4Glc $\beta$ -Sp0                                                                                                                 | 29   | 26  | 82   | 53  | 33 | 8  | 38  | 6  | 67  | 13 |
| 240 | Neu5Ac $\alpha$ 2-3Gal $\beta$ 1-4Glc $\beta$ -Sp8                                                                                                                 | -14  | 24  | 21   | 55  | 19 | 6  | 61  | 22 | 19  | 7  |
| 241 | Gal $\beta$ 1-4GlcNAc $\beta$ 1-2Man $\alpha$ 1-3(Fuca1-3(Gal $\beta$ 1-4)GlcNAc $\beta$ 1-2Man $\alpha$ 1-6)Man $\beta$ 1-4GlcNAc $\beta$ 1-4GlcNAc $\beta$ -Sp20 | 774  | 105 | 25   | 39  | 0  | 0  | 30  | 7  | 0   | 0  |
| 242 | Neu5Ac $\alpha$ 2-6GalNAc $\alpha$ -Sp8                                                                                                                            | -10  | 33  | 12   | 38  | 25 | 6  | 15  | 4  | 63  | 14 |
| 243 | Neu5Ac $\alpha$ 2-6GalNAc $\beta$ 1-4GlcNAc $\beta$ -Sp0                                                                                                           | 226  | 125 | 78   | 43  | 11 | 7  | 81  | 43 | 66  | 16 |
| 244 | Neu5Ac $\alpha$ 2-6Gal $\beta$ 1-4[6OSO3]GlcNAc $\beta$ -Sp8                                                                                                       | 120  | 159 | 39   | 120 | 13 | 4  | 67  | 19 | 118 | 16 |
| 245 | Neu5Ac $\alpha$ 2-6Gal $\beta$ 1-4GlcNAc $\beta$ -Sp0                                                                                                              | 63   | 91  | -1   | 26  | 20 | 7  | 67  | 29 | 121 | 53 |
| 246 | Neu5Ac $\alpha$ 2-6Gal $\beta$ 1-4GlcNAc $\beta$ -Sp8                                                                                                              | -38  | 41  | 56   | 35  | 21 | 4  | 34  | 8  | 61  | 12 |
| 247 | Neu5Ac $\alpha$ 2-6Gal $\beta$ 1-4GlcNAc $\beta$ 1-3Gal $\beta$ 1-4(Fuca1-3)GlcNAc $\beta$ 1-3Gal $\beta$ 1-4(Fuca1-3)GlcNAc $\beta$ -Sp0                          | 72   | 40  | 142  | 67  | 29 | 8  | 47  | 14 | 90  | 21 |
| 248 | Neu5Ac $\alpha$ 2-6Gal $\beta$ 1-4GlcNAc $\beta$ 1-3Gal $\beta$ 1-4GlcNAc $\beta$ -Sp0                                                                             | 21   | 140 | 346  | 99  | 37 | 14 | 63  | 9  | 50  | 12 |
| 249 | Neu5Ac $\alpha$ 2-6Gal $\beta$ 1-4Glc $\beta$ -Sp0                                                                                                                 | 71   | 71  | 64   | 31  | 21 | 6  | 17  | 18 | 81  | 11 |
| 250 | Neu5Ac $\alpha$ 2-6Gal $\beta$ 1-4Glc $\beta$ -Sp8                                                                                                                 | 128  | 39  | 114  | 84  | 17 | 8  | 44  | 12 | 59  | 14 |
| 251 | Neu5Ac $\alpha$ 2-6Gal $\beta$ -Sp8                                                                                                                                | -1   | 47  | 42   | 29  | 26 | 2  | 13  | 8  | 72  | 8  |

|     |                                                                                                                                                                              |      |     |      |      |     |    |     |    |     |    |
|-----|------------------------------------------------------------------------------------------------------------------------------------------------------------------------------|------|-----|------|------|-----|----|-----|----|-----|----|
| 252 | Neu5Ac $\alpha$ 2-8Neu5Ac $\alpha$ -Sp8                                                                                                                                      | 107  | 78  | 13   | 6    | 17  | 6  | 20  | 10 | 51  | 6  |
| 253 | Neu5Ac $\alpha$ 2-8Neu5Ac $\alpha$ 2-3Gal $\beta$ 1-4Glc $\beta$ -Sp0                                                                                                        | -72  | 55  | 245  | 556  | 13  | 9  | 11  | 27 | 99  | 8  |
| 254 | Neu5Ac $\beta$ 2-6GalNAc $\alpha$ -Sp8                                                                                                                                       | 69   | 120 | 311  | 179  | 56  | 11 | 20  | 4  | 36  | 3  |
| 255 | Neu5Ac $\beta$ 2-6Gal $\beta$ 1-4GlcNAc $\beta$ -Sp8                                                                                                                         | 16   | 40  | 31   | 64   | -14 | 6  | 32  | 8  | 50  | 16 |
| 256 | Gal $\beta$ 1-4GlcNAc $\beta$ 1-2Man $\alpha$ 1-3(Neu5Ac $\alpha$ 2-6Gal $\beta$ 1-4GlcNAc $\beta$ 1-2Man $\alpha$ 1-6)Man $\beta$ 1-4GlcNAc $\beta$ 1-4GlcNAc $\beta$ -Sp21 | 475  | 239 | 42   | 68   | 0   | 0  | 48  | 13 | 0   | 0  |
| 257 | Neu5Gca2-3Gal $\beta$ 1-3(Fuca1-4)GlcNAc $\beta$ -Sp0                                                                                                                        | 112  | 65  | 77   | 109  | 4   | 1  | 28  | 3  | 51  | 6  |
| 258 | Neu5Gca2-3Gal $\beta$ 1-3GlcNAc $\beta$ -Sp0                                                                                                                                 | 302  | 106 | 91   | 60   | 36  | 7  | 40  | 12 | 62  | 8  |
| 259 | Neu5Gca2-3Gal $\beta$ 1-4(Fuca1-3)GlcNAc $\beta$ -Sp0                                                                                                                        | 253  | 33  | 121  | 87   | 17  | 12 | 61  | 49 | 67  | 13 |
| 260 | Neu5Gca2-3Gal $\beta$ 1-4GlcNAc $\beta$ -Sp0                                                                                                                                 | 441  | 72  | 109  | 51   | 33  | 8  | 25  | 6  | 88  | 21 |
| 261 | Neu5Gca2-3Gal $\beta$ 1-4Glc $\beta$ -Sp0                                                                                                                                    | 170  | 81  | 48   | 20   | 15  | 7  | 34  | 22 | 102 | 11 |
| 262 | Neu5Gca2-6GalNAc $\alpha$ -Sp0                                                                                                                                               | 36   | 27  | 24   | 27   | 40  | 14 | 34  | 9  | 121 | 20 |
| 263 | Neu5Gca2-6Gal $\beta$ 1-4GlcNAc $\beta$ -Sp0                                                                                                                                 | 83   | 47  | 45   | 16   | 33  | 9  | 63  | 26 | 96  | 25 |
| 264 | Neu5Gca $\alpha$ -Sp8                                                                                                                                                        | 76   | 77  | 89   | 44   | 10  | 16 | 41  | 4  | 111 | 24 |
| 265 | [3OSO3]Gal $\beta$ 1-4(Fuca1-3)(6OSO3)Glc-Sp0                                                                                                                                | 118  | 118 | 3431 | 4148 | 31  | 21 | 52  | 8  | 165 | 39 |
| 266 | [3OSO3]Gal $\beta$ 1-4(Fuca1-3)Glc-Sp0                                                                                                                                       | 32   | 32  | 65   | 38   | 24  | 5  | 44  | 16 | 95  | 11 |
| 267 | [3OSO3]Gal $\beta$ 1-4[Fuca1-3][6OSO3]GlcNAc-Sp8                                                                                                                             | 305  | 483 | 81   | 20   | 39  | 21 | 63  | 35 | 97  | 11 |
| 268 | [3OSO3]Gal $\beta$ 1-4[Fuca1-3]GlcNAc-Sp0                                                                                                                                    | 240  | 70  | 377  | 105  | 10  | 6  | 111 | 32 | 93  | 15 |
| 269 | Fuca1-2[6OSO3]Gal $\beta$ 1-4GlcNAc-Sp0                                                                                                                                      | -23  | 68  | 48   | 39   | 23  | 10 | 46  | 10 | 71  | 7  |
| 270 | Fuca1-2Gal $\beta$ 1-4[6OSO3]GlcNAc-Sp8                                                                                                                                      | 1194 | 646 | 176  | 78   | 15  | 3  | 72  | 23 | 61  | 19 |
| 271 | Fuca1-2[6OSO3]Gal $\beta$ 1-4[6OSO3]Glc-Sp0                                                                                                                                  | -44  | 85  | 38   | 42   | 2   | 11 | 24  | 14 | 115 | 4  |
| 272 | Fuca1-2-(6OSO3)-Gal $\beta$ 1-4Glc-Sp0                                                                                                                                       | 56   | 71  | 70   | 44   | 0   | 0  | 0   | 4  |     |    |
| 273 | Fuca1-2-Gal $\beta$ 1-4[6OSO3]Glc-Sp0                                                                                                                                        | 49   | 69  | 121  | 17   | 469 | 82 | 53  | 17 | 79  | 25 |
| 274 | Gal $\beta$ 1-3(Fuca1-4)GlcNAc $\beta$ 1-3Gal $\beta$ 1-3(Fuca1-4)GlcNAc $\beta$ -Sp0                                                                                        | 145  | 78  | 118  | 129  | 39  | 6  | 31  | 11 | 42  | 6  |
| 275 | Gal $\beta$ 1-3-(Gal $\beta$ 1-4GlcNAc $\beta$ 1-6)GalNAc-Sp14                                                                                                               | -40  | 39  | 155  | 147  | 37  | 16 | 10  | 22 | 47  | 19 |
| 276 | Gal $\beta$ 1-3(GlcNAc $\beta$ 1-6)GalNAc-Sp14                                                                                                                               | 74   | 49  | 30   | 28   | 35  | 11 | 21  | 5  | 55  | 7  |
| 277 | Gal $\beta$ 1-3-(Neu5Ac $\alpha$ 2-3Gal $\beta$ 1-4GlcNAc $\beta$ 1-6)GalNAc-Sp14                                                                                            | 460  | 132 | 378  | 208  | 18  | 8  | 66  | 13 | 87  | 7  |
| 278 | Gal $\beta$ 1-3GalNAc-Sp14                                                                                                                                                   | 55   | 89  | 58   | 10   | 38  | 18 | 88  | 38 | 99  | 16 |
| 279 | Gal $\beta$ 1-3GlcNAc $\beta$ 1-3Gal $\beta$ 1-3GlcNAc $\beta$ -Sp0                                                                                                          | 426  | 217 | 132  | 24   | 148 | 36 | 62  | 16 | 85  | 13 |
| 280 | Gal $\beta$ 1-4[Fuca1-3][6OSO3]GlcNAc-Sp0                                                                                                                                    | 115  | 42  | 281  | 207  | 41  | 7  | 38  | 11 | 85  | 21 |
| 281 | Gal $\beta$ 1-4[Fuca1-3][6OSO3]Glc-Sp0                                                                                                                                       | 48   | 88  | 57   | 18   | 33  | 8  | 36  | 10 | 81  | 15 |

|     |                                                                                           |       |       |     |     |     |    |     |    |     |    |
|-----|-------------------------------------------------------------------------------------------|-------|-------|-----|-----|-----|----|-----|----|-----|----|
| 282 | Galβ1-4(Fuca1-3)GlcNAcβ1-3Galβ1-3(Fuca1-4)GlcNAcβ-Sp0                                     | 127   | 46    | 31  | 11  | 89  | 14 | 87  | 24 | 56  | 6  |
| 283 | Galβ1-4GlcNAcβ1-3Galβ1-3GlcNAcβ-Sp0                                                       | 495   | 586   | 640 | 97  | 64  | 21 | 103 | 15 | 83  | 2  |
| 284 | Neu5Aca2-3Galβ1-3GlcNAcβ1-3Galβ1-3GlcNAcβ-Sp0                                             | 348   | 37    | 385 | 258 | 110 | 27 | 43  | 3  | 71  | 15 |
| 285 | Neu5Aca2-3Galβ1-4GlcNAcβ1-3Galβ1-3GlcNAcβ-Sp0                                             | 124   | 140   | 115 | 20  | 42  | 18 | 59  | 20 | 71  | 5  |
| 286 | [3OSO3]Galβ1-4[6OSO3]GlcNAcβ-Sp0                                                          | 27082 | 14870 | 687 | 402 | 38  | 8  | 68  | 41 | 85  | 6  |
| 287 | [3OSO3][4OSO3]Galβ1-4GlcNAcβ-Sp0                                                          | 14    | 53    | 81  | 79  | -14 | 14 | 53  | 26 | 47  | 5  |
| 288 | [6OSO3]Galβ1-4[6OSO3]GlcNAcβ-Sp0                                                          | 20    | 51    | 51  | 33  | 42  | 9  | 29  | 13 | 126 | 12 |
| 289 | 6-H2PO3Glcβ-Sp10                                                                          | 67    | 59    | 344 | 493 | 3   | 2  | 34  | 3  | 26  | 5  |
| 290 | Galα1-3(Fuca1-2)Galβ-Sp18                                                                 | 71    | 22    | -1  | 13  | 24  | 11 | 17  | 6  | 71  | 7  |
| 291 | Galα1-3GalNAcα-Sp16                                                                       | 170   | 161   | 290 | 177 | 11  | 7  | 50  | 19 | 70  | 23 |
| 292 | Galβ1-3GalNAcα-Sp16                                                                       | 214   | 49    | 118 | 101 | 16  | 1  | 59  | 11 | 94  | 12 |
| 293 | Galβ1-3(Neu5Aca2-3Galβ1-4(Fuca1-3)GlcNAcβ1-6)GalNAc-Sp14                                  | 141   | 84    | 31  | 437 | 86  | 16 | 32  | 5  | 86  | 10 |
| 294 | Galβ1-3Galβ1-4GlcNAcβ-Sp8                                                                 | 652   | 262   | 47  | 29  | 256 | 24 | 18  | 9  | 66  | 10 |
| 295 | Galβ1-4GlcNAcβ1-2Manα1-3(Neu5Aca2-6Galβ1-4GlcNAcβ1-2Manα1-6)Manβ1-4GlcNAcβ1-4GlcNAcβ-Sp12 | 1140  | 16    | 13  | 20  | 24  | 16 | 55  | 19 | 116 | 19 |
| 296 | Galβ1-4GlcNAcβ1-3(Galβ1-4GlcNAcβ1-6)Galβ1-4GlcNAc-Sp0                                     | 17520 | 7379  | 179 | 71  | 6   | 5  | 2   | 5  | 124 | 16 |
| 297 | Galβ1-4GlcNAcβ1-3(GlcNAcβ1-6)Galβ1-4GlcNAc-Sp0                                            | 3521  | 158   | 5   | 59  | 15  | 10 | 23  | 22 | 63  | 7  |
| 298 | Galβ1-4GlcNAcα1-6Galβ1-4GlcNAcβ-Sp0                                                       | 28251 | 1882  | 117 | 106 | 18  | 6  | 21  | 8  | 86  | 17 |
| 299 | Galβ1-4GlcNAcβ1-6Galβ1-4GlcNAcβ-Sp0                                                       | 973   | 294   | 446 | 812 | 22  | 21 | 35  | 23 | 118 | 17 |
| 300 | GalNAcα-Sp15                                                                              | 112   | 213   | 20  | 9   | 14  | 1  | 5   | 9  | 69  | 8  |
| 301 | GalNAcα1-3(Fuca1-2)Galβ-Sp18                                                              | 43    | 137   | 41  | 61  | 10  | 8  | 5   | 9  | 55  | 14 |
| 302 | GalNAcβ1-3Galβ-Sp8                                                                        | 194   | 76    | -1  | 35  | 190 | 53 | 27  | 8  | 69  | 11 |
| 303 | GlcAβ1-3GlcNAcβ-Sp8                                                                       | 123   | 116   | -17 | 24  | 174 | 37 | 45  | 15 | 477 | 13 |
| 304 | GlcNAcβ1-2Manα1-3(Neu5Aca2-6Galβ1-4GlcNAcβ1-2Manα1-6)Manβ1-4GlcNAcβ1-4GlcNAcβ-Sp12        | -47   | 30    | 36  | 71  | 21  | 12 | 31  | 13 | 109 | 23 |
| 305 | GlcNAcβ1-2Manα1-3(GlcNAcβ1-2Manα1-6)Manβ1-4GlcNAcβ1-4GlcNAcβ-Sp12                         | -92   | 39    | 34  | 36  | 9   | 9  | 13  | 3  | 88  | 11 |
| 306 | GlcNAcβ1-3Man-Sp10                                                                        | 61    | 73    | 71  | 54  | 15  | 2  | 160 | 37 | 68  | 12 |
| 307 | GlcNAcβ1-4GlcNAcβ-Sp10                                                                    | -6    | 28    | -8  | 22  | 23  | 11 | 47  | 24 | 65  | 4  |
| 308 | GlcNAcβ1-4GlcNAcβ-Sp12                                                                    | 35    | 49    | 19  | 14  | 49  | 10 | 40  | 18 | 39  | 7  |



|     |                                                                                                     |      |     |     |     |     |    |     |    |     |    |
|-----|-----------------------------------------------------------------------------------------------------|------|-----|-----|-----|-----|----|-----|----|-----|----|
| 309 | HOOC(CH <sub>3</sub> )CH-3-O-GlcNAcβ1-4GlcNAcβ-Sp10                                                 | -114 | 76  | 17  | 22  | 26  | 2  | 61  | 35 | 77  | 2  |
| 310 | Manα1-3(Manα1-6)Manβ1-4GlcNAcβ1-4GlcNAcβ-Sp12                                                       | 43   | 86  | 73  | 56  | 25  | 9  | 5   | 4  | 97  | 7  |
| 311 | Manα1-6Manβ-Sp10                                                                                    | -2   | 30  | 49  | 92  | 56  | 13 | 19  | 8  | 44  | 10 |
| 312 | Manα1-6(Manα1-3)Manα1-6(Manα1-3)Manβ-Sp10                                                           | 107  | 86  | 81  | 46  | 12  | 4  | 57  | 24 | 68  | 14 |
| 313 | Manα1-2Manα1-2Manα1-3(Manα1-2Manα1-6(Manα1-3)Manα1-6)Manα-Sp9                                       | 66   | 48  | 37  | 57  | 13  | 2  | 27  | 16 | 42  | 13 |
| 314 | Manα1-2Manα1-2Manα1-3(Manα1-2Manα1-6(Manα1-2Manα1-3)Manα1-6)Manα-Sp9                                | 77   | 30  | 67  | 27  | 20  | 6  | 22  | 6  | 64  | 9  |
| 315 | Neu5Acα2-3Galβ1-3(Neu5Acα2-3Galβ1-4GlcNAcβ1-6)GalNAc-Sp14                                           | 66   | 187 | 530 | 533 | -17 | 7  | 145 | 54 | 54  | 7  |
| 316 | Neu5Acα2-3Galβ1-3(Neu5Acα2-6)GalNAc-Sp14                                                            | 166  | 109 | 30  | 15  | 75  | 32 | 76  | 21 | 118 | 2  |
| 317 | Neu5Acα2-3Galβ1-3GalNAc-Sp14                                                                        | 521  | 316 | 48  | 55  | -23 | 4  | 65  | 35 | 23  | 6  |
| 318 | Neu5Acα2-3Galβ1-4GlcNAcβ1-2Manα1-3(Neu5Acα2-6Galβ1-4GlcNAcβ1-2Manα1-6)Manβ1-4GlcNAcβ1-4GlcNAcβ-Sp12 | 883  | 375 | 41  | 17  | 34  | 11 | 21  | 10 | 84  | 4  |
| 319 | Neu5Acα2-6Galβ1-4GlcNAcβ1-2Manα1-3(Galβ1-4GlcNAcβ1-2Manα1-6)Manβ1-4GlcNAcβ1-4GlcNAcβ-Sp12           | 1556 | 47  | 46  | 28  | 47  | 15 | 40  | 16 | 102 | 28 |
| 320 | Neu5Acα2-6Galβ1-4GlcNAcβ1-2Manα1-3(GlcNAcβ1-2Manα1-6)Manβ1-4GlcNAcβ1-4GlcNAcβ-Sp12                  | -68  | 106 | 12  | 21  | 24  | 8  | 20  | 15 | 61  | 7  |
