# Supplementary material
Source: PubMed Central journal article supplement (PMC2853181)
Supplement: NIHMS170964-supplement-2.pdf [file NIHMS170964-supplement-2.pdf]

## Supplementary Information Titles

Please list each supplementary item and its title or caption, in the order shown below.

**Note that we do NOT copy edit or otherwise change supplementary information, and minor (nonfactual) errors in these documents cannot be corrected after publication.**

Please submit document(s) exactly as you want them to appear, with all text, images, legends and references in the desired order, and check carefully for errors.

**Journal:** Nature Medicine

|                       |                                                                    |
|-----------------------|--------------------------------------------------------------------|
| Article Title:        | Innate immune lectins kill bacteria expressing blood group antigen |
| Corresponding Author: | Richard D. Cummings                                                |
|                       |                                                                    |

| Supplementary Item & Number<br>(add rows as necessary) | Title or Caption                                                                                                                                                                                                                                                                                                                                                                                                                           |
|--------------------------------------------------------|--------------------------------------------------------------------------------------------------------------------------------------------------------------------------------------------------------------------------------------------------------------------------------------------------------------------------------------------------------------------------------------------------------------------------------------------|
| Supplementary Figure 1                                 | [TITLE OF FIGURE (descriptive title used in legend)]<br><b>Purity of Galectins.</b>                                                                                                                                                                                                                                                                                                                                                        |
| Supplementary Table 1                                  | [TITLE OF TABLE (descriptive title)]<br><b>Complete list of glycans present on the CFG glycan microarray and raw data for galectin binding.</b>                                                                                                                                                                                                                                                                                            |
| Supplementary Methods (or Discussion or Data or Note)  | [NO DESCRIPTIVE TITLE NECESSARY]                                                                                                                                                                                                                                                                                                                                                                                                           |
| Supplementary Video 1 (or Audio or Spreadsheet)        | [CAPTION TO BE POSTED ONLINE (include title and explanation of contents)]<br><b>Immobilization of BG B<sup>+</sup> <i>E. coli</i> after addition of Gal-8.</b> BG B <sup>+</sup> <i>E. coli</i> observed in real time before and after addition of 5 $\mu$ M Gal-8 at approximately 20 seconds. Bacteria demonstrate normal movement and viability before addition of galectin and loss of mobility immediately following Gal-8 treatment. |
